# Supplementary material for: Nonlethal amphibian skin swabbing of cutaneous natural products for HPLC fingerprinting
Source: Royal Society of Chemistry journal article supplement (doi:10.1039/c4ay00566j), 2014-01-01
Supplement: c4ay00566j1.pdf [file c4ay00566j1.pdf]

*ELECTRONIC SUPPLEMENTARY INFORMATION FOR*  
**NONLETHAL AMPHIBIAN SKIN SWABBING OF CUTANEOUS NATURAL  
PRODUCTS FOR HPLC FINGERPRINTING**

Thomas P. Umile,<sup>a</sup> Patrick J. McLaughlin,<sup>b</sup> Kendall R. Johnson,<sup>a</sup> Shaya Honarvar,<sup>b</sup>  
Alison L. Blackman,<sup>c</sup> Elizabeth A. Burzynski,<sup>a</sup> Robert W. Davis,<sup>a</sup> Thais L. Teotonio,<sup>c</sup>  
Gail W. Hearn,<sup>b</sup> Christine A. Hughey,<sup>c</sup> Anthony F. Lagalante,<sup>a</sup> and Kevin P.C.  
Minbiole<sup>a\*</sup>

<sup>a</sup> Department of Chemistry, Villanova University, Villanova, PA 19085 USA

<sup>b</sup> Department of Biology, Drexel University, Philadelphia, PA 19104 USA

<sup>c</sup> Department of Chemistry, James Madison University, Harrisonburg, VA 22807 USA

\* corresponding author contact information:

email: kevin.minbiole@villanova.edu

tel: 610-519-4873

fax: 610-519-7167

## SWABBING OF FROGS ON BOKO ISLAND

*Swabbing of Bioko Frogs.* Frog specimens were collected at night by hand from four different locations on Bioko Island. These sites ranged in elevation from 0-1400 m asl. Arena Blanca (0-100 m asl) consists of dense lowland tropical forest and brackish swamps, and represented 4% of total sampling effort. Risule and Moeri were comparable sites (400-700 m asl) consisting of a patchwork of disturbed and pristine submontane forest, and represented 85% of total sampling effort. Moka (1300-1400 m asl) is a mixture of montane tropical forest with large areas converted for agriculture, and represented 11% of total sampling effort. A total of 47 specimens were collected for swabbing across all sites. Frog cataloging information is listed below (Table S1).

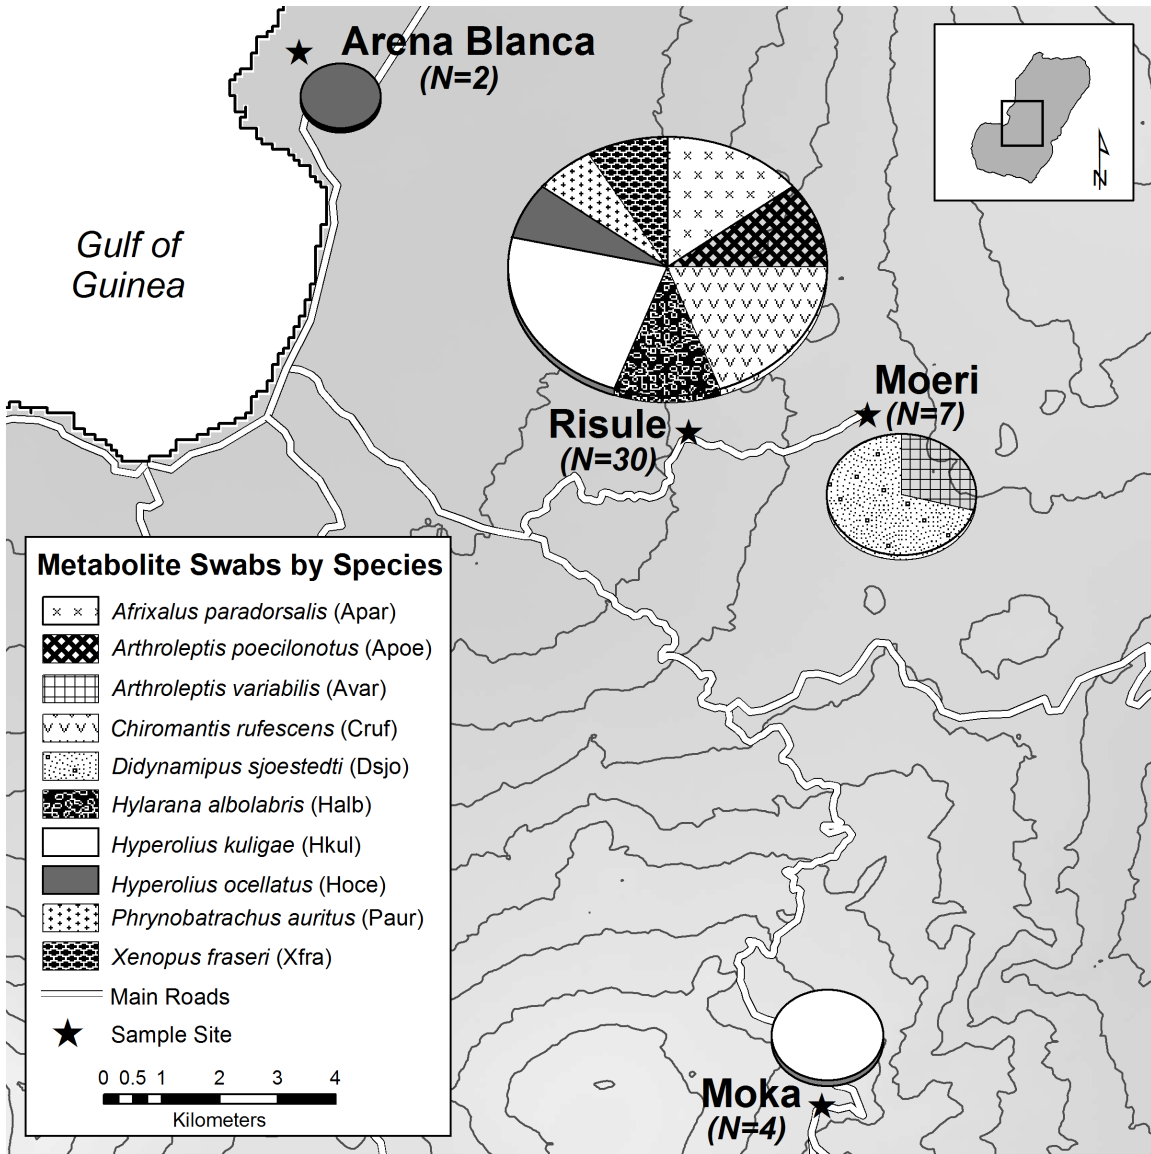

**Fig. S1** Map of sampling sites on Bioko Island, Equatorial Guinea. The figure details the number and species of specimens from each site. Inset shows Bioko Island with focal area containing sample sites.

| Family         | Genus           | Species      | Map/PCO ID | Swabs | Sample Site               | Body Size | Voucher Specimens | Healthy Release |
|----------------|-----------------|--------------|------------|-------|---------------------------|-----------|-------------------|-----------------|
| Arthroleptidae | Arthroleptis    | variabilis   | Avar       | 2     | Moeri                     | Medium    | 2                 | 0               |
|                | Arthroleptis    | poecilonotus | Apoe       | 3     | Risule                    | Small     | 0                 | 3               |
| Bufonidae      | Didynamipus     | sjostedti    | Dsjo       | 5     | Moeri                     | Tiny      | 0                 | 5               |
| Hyperoliidae   | Afrivalus       | paradorsalis | Apar       | 5     | Risule                    | Medium    | 0                 | 5               |
|                | Hyperolius      | kuligae      | Hkul       | 9     | 5- Risule; 4- Moka        | Small     | 5                 | 4               |
|                | Hyperolius      | ocellatus    | Hoce       | 4     | 1- Arena Blanca; 2- Risuk | Small     | 4                 | 0               |
| Petropedetidae | Phrynobatrachus | auritus      | Paur       | 2     | Risule                    | Medium    | 0                 | 2               |
| Pipidae        | Xenopus         | fraseri      | Xfra       | 3     | Risule                    | Large     | 3                 | 0               |
| Ranidae        | Hylarana        | albolabris   | Halb       | 4     | Risule                    | Large     | 4                 | 0               |
| Rhacophoridae  | Chiromantis     | rufescens    | Cruf       | 6     | Risule                    | Large     | 0                 | 6               |

**Table S1.** Summary of species sampled for cutaneous bacteria and small molecules on Bioko Island.

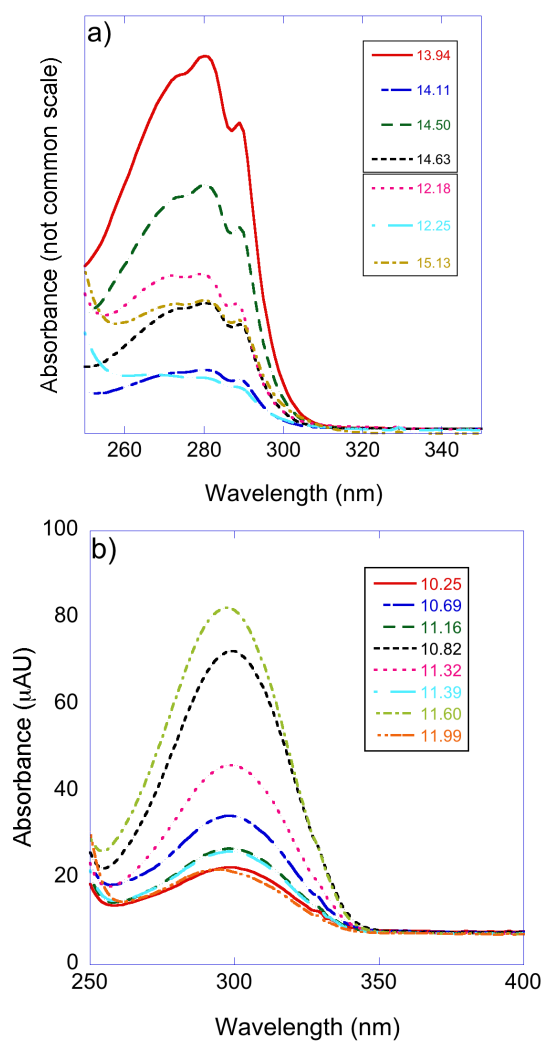

**Fig. S2** Overlays of UV-Vis spectra of fingerprint compounds from a) *A. paradorsalis* and b) *D. sjostedti* (inset legends refer to the corresponding retention time in min)

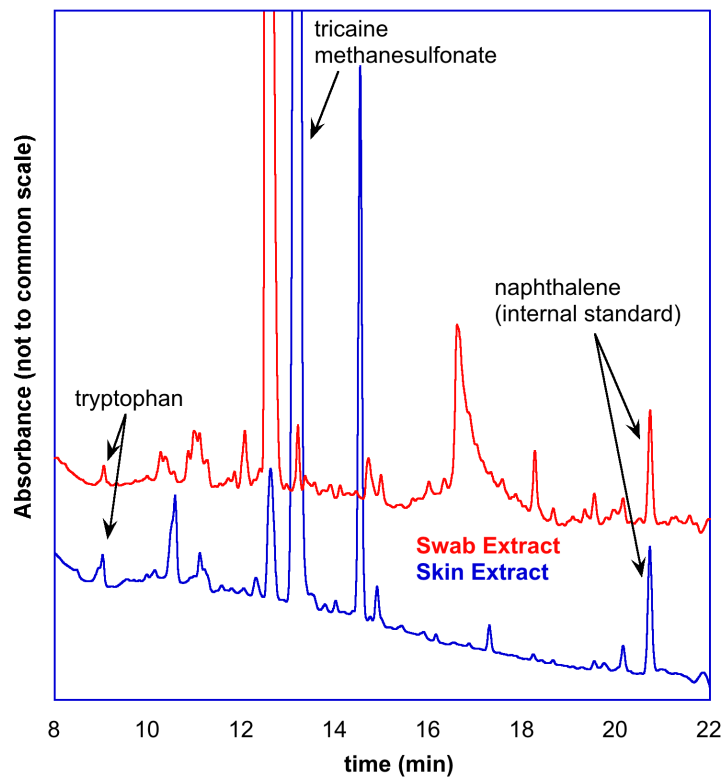

**Fig. S3** Overlay of representative total wavelength chromatograms from swab extract and skin extract from a single frog specimen

**Table S2** (*follows*) A comprehensive table of compounds found on each frog specimen, along with other specimen-specific notes. For each specimen, sample site and collection data are provided, along with notes regarding the location and/or microhabitat they were discovered in before capture. Where possible, sex was determined for each specimen. For each specimen, an "X" indicates a small molecule ("metabolite"), bacteria, or tissue sample was taken, while an "O" indicates no sample was taken. In the cases where two swab samples were taken, a starred X ("X\*") indicates the sample that was collected first. For the "Specimen" column, an "X" indicates a museum specimen was preserved, "Healthy Release" indicates the specimen was released healthy to the site of capture within 24 hours, and "Skin Sample" indicates a skin tissue sample was taken and it was prepared as a museum specimen

| Specimen No. | Species                         | Sampling Date | Notes                                               | Sex | Location            | Metabolite Swab | Skin Bacteria Swab | Tissue Sample | Specimen        | Chromophore (nm)     |                  |
|--------------|---------------------------------|---------------|-----------------------------------------------------|-----|---------------------|-----------------|--------------------|---------------|-----------------|----------------------|------------------|
|              |                                 |               |                                                     |     |                     |                 |                    |               |                 | Retention Time (min) | Chromophore (nm) |
| 1            | <i>Afrivalus paradorsalis</i>   | 9/19/12       | Cement water tank                                   | -   | Risule              | X               | X*                 | O             | Healthy Release | 7.58                 | 271              |
| 2            | <i>Afrivalus paradorsalis</i>   | 9/19/12       | Cement water tank                                   | M   | Risule              | X*              | X                  | O             | Healthy Release | 7.74                 | 268              |
| 3            | <i>Afrivalus paradorsalis</i>   | 9/19/12       | Cement water tank                                   | M   | Risule              | X               | X*                 | O             | Healthy Release | 7.78                 | none             |
| 4            | <i>Afrivalus paradorsalis</i>   | 9/19/12       | Cement water tank                                   | M   | Risule              | X*              | X                  | O             | Healthy Release | 7.80                 | none             |
| 5            | <i>Afrivalus paradorsalis</i>   | 9/19/12       | Cement water tank                                   | M   | Risule              | X               | X*                 | O             | Healthy Release | 7.82                 | none             |
| 6            | <i>Arthroleptis poecilnotus</i> | 9/21/12       | Fern on edge of trail                               | -   | Risule              | X               | X*                 | O             | Healthy Release | 7.83                 | 274, 351         |
| 7            | <i>Arthroleptis poecilnotus</i> | 9/21/12       | Fern on edge of trail                               | -   | Risule              | X*              | X                  | O             | Healthy Release | 7.86                 | 268              |
| 8            | <i>Arthroleptis poecilnotus</i> | 9/21/12       | Fern on edge of trail                               | -   | Risule              | X               | X*                 | O             | Healthy Release | 7.98                 | 280              |
| 9            | <i>Arthroleptis sylvaticus</i>  | 9/16/12       | Orange & Yellow Ventral Side                        | F   | Moeri               | X*              | X                  | X             | X               | 8.00                 | 272, 357         |
| 10           | <i>Arthroleptis variabilis</i>  | 9/16/12       | Green                                               | -   | Moeri               | X*              | X                  | X             | X               | 8.02                 | 261              |
| 11           | <i>Arthroleptis variabilis</i>  | 9/16/12       | White w/ black pattern                              | -   | Moeri               | X               | X*                 | X             | X               | 8.08                 | none             |
| 12           | <i>Chiromantis rufescens</i>    | 9/19/12       | Banana leaf above cement tank                       | F   | Risule              | X*              | X                  | O             | Healthy Release | 8.09                 | 274, 354         |
| 13           | <i>Chiromantis rufescens</i>    | 9/19/12       | Banana leaf above cement tank                       | M   | Risule              | X               | X*                 | O             | Healthy Release | 8.13                 | none             |
| 14           | <i>Chiromantis rufescens</i>    | 9/19/12       | Banana leaf above cement tank                       | M   | Risule              | X*              | X                  | O             | Healthy Release | 8.17                 | none             |
| 15           | <i>Chiromantis rufescens</i>    | 9/19/12       | Banana leaf above cement tank                       | M   | Risule              | X               | X*                 | O             | Healthy Release | 8.18                 | 271              |
| 16           | <i>Chiromantis rufescens</i>    | 9/19/12       | Banana leaf above cement tank                       | M   | Risule              | X*              | X                  | O             | Healthy Release | 8.20                 | none             |
| 17           | <i>Chiromantis rufescens</i>    | 9/19/12       | Banana leaf above cement tank                       | M   | Risule              | X               | X*                 | O             | Healthy Release | 8.21                 | 269              |
| 18           | <i>Didynamipus sjostedti</i>    | 9/16/12       | Leaf litter alongside trail                         | F   | Moeri               | X*              | X                  | X             | X               | 8.25                 | none             |
| 19           | <i>Didynamipus sjostedti</i>    | 9/16/12       | Leaf litter alongside trail                         | M   | Moeri               | X               | X*                 | X             | X               | 8.29                 | 271              |
| 20           | <i>Didynamipus sjostedti</i>    | 9/16/12       | Leaf litter alongside trail                         | F   | Moeri               | X               | X*                 | X             | X               | 8.33                 | 270              |
| 21           | <i>Didynamipus sjostedti</i>    | 9/16/12       | Leaf litter alongside trail                         | M   | Moeri               | X*              | X                  | X             | X               | 8.38                 | 280              |
| 22           | <i>Didynamipus sjostedti</i>    | 9/16/12       | Leaf litter alongside trail                         | M   | Moeri               | X               | X*                 | X             | X               |                      |                  |
| 23           | <i>Hylarana albolabris</i>      | 9/19/12       | Cement water tank                                   | F   | Risule              | X*              | X                  | X             | X               |                      |                  |
| 24           | <i>Hylarana albolabris</i>      | 9/19/12       | Cement water tank                                   | -   | Risule              | X               | X*                 | X             | X               | +                    | +                |
| 25           | <i>Hylarana albolabris</i>      | 9/19/12       | Cement water tank                                   | -   | Risule              | X*              | X                  | X             | X               | +                    | +                |
| 26           | <i>Hylarana albolabris</i>      | 9/19/12       | Cement water tank                                   | -   | Risule              | X               | X*                 | X             | X               | +                    | +                |
| 27           | <i>Hyperolius kuligae</i>       | 9/17/12       | Metal drum, guarding nests                          | M   | Moka                | X               | X*                 | X             | Skin Sample     |                      |                  |
| 28           | <i>Hyperolius kuligae</i>       | 9/17/12       | Metal drum, guarding nests                          | M   | Moka                | X*              | X                  | X             | Skin Sample     |                      |                  |
| 29           | <i>Hyperolius kuligae</i>       | 9/19/12       | Cement water tank                                   | M   | Risule              | X*              | X                  | O             | Healthy Release |                      |                  |
| 30           | <i>Hyperolius kuligae</i>       | 9/19/12       | Non-dichromatic coloration; yellow ventral side     | F   | Risule              | X               | X*                 | X             | Skin Sample     |                      |                  |
| 31           | <i>Hyperolius kuligae</i>       | 9/19/12       | Cement water tank                                   | M   | Risule              | X*              | X                  | O             | Healthy Release |                      |                  |
| 32           | <i>Hyperolius kuligae</i>       | 9/19/12       | Cement water tank                                   | M   | Risule              | X               | X*                 | O             | Healthy Release |                      |                  |
| 33           | <i>Hyperolius kuligae</i>       | 9/19/12       | Cement water tank                                   | M   | Risule              | X*              | X                  | O             | Healthy Release |                      |                  |
| 34           | <i>Hyperolius kuligae</i>       | 9/17/12       | Metal drum, guarding nests                          | M   | Moka                | X               | X*                 | X             | Skin Sample     |                      |                  |
| 35           | <i>Hyperolius kuligae</i>       | 9/17/12       | Outside metal drum                                  | M   | Moka                | X*              | X                  | X             | Skin Sample     |                      |                  |
| 36           | <i>Hyperolius ocellatus</i>     | 9/21/12       | Di-chromatic coloration                             | F   | Risule              | X               | X*                 | X             | X               |                      |                  |
| 37           | <i>Hyperolius ocellatus</i>     | 9/21/12       | In amplexus with PJM436                             | M   | Risule              | X*              | X                  | X             | X               |                      |                  |
| 38           | <i>Hyperolius ocellatus</i>     | 9/21/12       | Di-chromatic coloration                             | F   | <i>Arena Blanca</i> | X*              | X                  | X             | Skin Sample     |                      |                  |
| 39           | <i>Hyperolius ocellatus</i>     | 9/21/12       | In amplexus with PJM438                             | M   | <i>Arena Blanca</i> | X               | X*                 | X             | Skin Sample     |                      |                  |
| 40           | <i>Leptopelis modestus</i>      | 9/19/12       | Banana leaf above cement tank                       | -   | Risule              | X*              | X                  | X             | X               |                      |                  |
| 41           | <i>Leptopelis sp.</i>           | 9/17/12       | Behind latrine at MWC                               | -   | Moka                | X               | X*                 | O             | Healthy Release |                      |                  |
| 42           | <i>Phlyctimantis boulengeri</i> | 9/19/12       | Orange and black ventral mottling, black vocal sack | M   | Risule              | X               | X*                 | X             | X               | +                    | +                |
| 43           | <i>Phrynobatrachus auritus</i>  | 9/21/12       | Fern on edge of trail                               | F   | Risule              | X*              | X                  | O             | Healthy Release |                      |                  |
| 44           | <i>Phrynobatrachus auritus</i>  | 9/21/12       | Fern on edge of trail                               | M   | Risule              | X               | X*                 | O             | Healthy Release |                      |                  |
| 45           | <i>Xenopus fraseri</i>          | 9/19/12       | Mud puddle near cement water tank                   | -   | Risule              | X               | X*                 | X             | X               |                      |                  |
| 46           | <i>Xenopus fraseri</i>          | 9/19/12       | Mud puddle near cement water tank                   | -   | Risule              | X*              | X                  | X             | X               |                      |                  |
| 47           | <i>Xenopus fraseri</i>          | 9/19/12       | Mud puddle near cement water tank                   | -   | Risule              | X               | X*                 | X             | X               |                      |                  |

| Specimen No. | 274, 354 |
|--------------|----------|
| 8.51         | none     |
| 8.54         | none     |
| 8.59         | none     |
| 8.65         | none     |
| 8.67         | 271      |
| 8.71         | none     |
| 8.75         | none     |
| 8.80         | none     |
| 8.89         | none     |
| + 9.01       | 279      |
| 9.04         | none     |
| 9.06         | 280      |
| 9.26         | 288      |
| 9.27         | 282      |
| 9.28         | 260      |
| 9.39         | none     |
| + 9.43       | 288      |
| 9.44         | none     |
| 9.45         | 273      |
| 9.59         | 264      |
| 9.64         | none     |
| 9.66         | 280      |
| + 9.68       | none     |
| + 9.85       | 271      |
| 9.86         | none     |
| 9.94         | none     |
| 10.05        | 280      |
| 10.25        | 298      |
| 10.26        | 252      |
| + 10.37      | 267      |
| 10.37        | 272      |
| 10.38        | none     |
| 10.43        | none     |
| 10.47        | 279      |
| 10.47        | none     |
| 10.54        | 324      |
| 10.69        | 300      |
| 10.70        | none     |
| 10.77        | none     |
| 10.80        | none     |
| 10.82        | none     |
| 10.82        | 298      |
| 10.84        | none     |
| + 10.86      | 280      |
| 10.88        | none     |
| 10.93        | 279      |
| 10.97        | 280      |
| 10.99        | 274      |
| 11.00        | none     |
| 11.02        | 279      |
| 11.04        | none     |
| + 11.08      | 280      |
| 11.09        | none     |
| 11.12        | none     |
| 11.13        | 280      |
| 11.16        | 298      |
| 11.17        | none     |
| 11.20        | none     |
| 11.28        | 279      |
| 11.32        | 298      |
| 11.34        | none     |





| Specimen No. | 15.85 | 15.85 | 15.88 | 16.03 | 16.48 | 16.86 | Sampling Date | Notes                                                        | Sex | Location            | GPS | Metabolism Swai | Skin Bacteria Swi | Tissue Sample      | Specimen           |
|--------------|-------|-------|-------|-------|-------|-------|---------------|--------------------------------------------------------------|-----|---------------------|-----|-----------------|-------------------|--------------------|--------------------|
| 1            | none  |       |       |       |       |       | 9/19/16       | Cement water tank                                            | -   | Risule              | X   | X               | O                 | Healthy Release    | Healthy Release    |
| 2            | 275   |       |       |       |       |       | 9/19/16       | Cement water tank                                            | M   | Risule              | X   | X               | O                 | Healthy Release    | Healthy Release    |
| 3            |       |       |       |       |       |       | 9/19/16       | Cement water tank                                            | M   | Risule              | X   | X               | O                 | Healthy Release    | Healthy Release    |
| 4            |       |       |       |       |       |       | 9/19/16       | Cement water tank                                            | M   | Risule              | X   | X               | O                 | Healthy Release    | Healthy Release    |
| 5            |       |       |       |       |       |       | 9/19/16       | Cement water tank                                            | M   | Risule              | X   | X               | O                 | Healthy Release    | Healthy Release    |
| 6            |       |       |       |       |       |       | 9/21/16       | Fern on edge of trail                                        | -   | Risule              | X   | X               | O                 | Healthy Release    | X                  |
| 7            |       |       |       |       |       |       | 9/21/16       | Fern on edge of trail                                        | -   | Risule              | X   | X               | O                 | Healthy Release    | Healthy Release    |
| 8            |       |       |       |       |       |       | 9/21/16       | Fern on edge of trail                                        | -   | Risule              | X   | X               | O                 | Healthy Release    | Healthy Release    |
| 9            |       |       |       |       |       |       | 9/16/16       | Orange & Yellow Ventral Side                                 | F   | Moeri               | X   | X               | X                 | X                  | Healthy Release    |
| 10           |       |       |       |       |       |       | 9/16/16       | Green                                                        | -   | Moeri               | X   | X               | X                 | X                  | X                  |
| 11           |       |       |       |       |       |       | 9/16/16       | White w/ black pattern                                       | -   | Moeri               | X   | X               | X                 | X                  | X                  |
| 12           |       |       |       |       |       |       | 9/19/16       | Banana leaf above cement tank                                | F   | Risule              | X   | X               | O                 | Healthy Release    | Healthy Release    |
| 13           |       |       |       |       |       |       | 9/19/16       | Banana leaf above cement tank                                | M   | Risule              | X   | X               | O                 | Healthy Release    | Healthy Release    |
| 14           |       |       |       |       |       |       | 9/19/16       | Banana leaf above cement tank                                | M   | Risule              | X   | X               | O                 | Healthy Release    | Healthy Release    |
| 15           |       |       |       |       |       |       | 9/19/16       | Banana leaf above cement tank                                | M   | Risule              | X   | X               | O                 | Healthy Release    | Healthy Release    |
| 16           |       |       |       |       |       |       | 9/19/16       | Banana leaf above cement tank                                | M   | Risule              | X   | X               | O                 | Healthy Release    | Healthy Release    |
| 17           |       |       |       |       |       |       | 9/19/16       | Banana leaf above cement tank                                | M   | Risule              | X   | X               | O                 | Healthy Release    | Healthy Release    |
| 18           |       |       |       |       |       |       | 9/16/16       | -                                                            | F   | Moeri               | X   | X               | X                 | Healthy Release    | Healthy Release    |
| 19           |       |       |       |       |       |       | 9/16/16       | -                                                            | M   | Moeri               | X   | X               | X                 | Healthy Release    | Healthy Release    |
| 20           |       |       |       |       |       |       | 9/16/16       | -                                                            | F?  | Moeri               | X   | X               | X                 | Healthy Release    | Healthy Release    |
| 21           |       |       |       |       |       |       | 9/16/16       | -                                                            | M   | Moeri               | X   | X               | X                 | Healthy Release    | Healthy Release    |
| 22           |       |       |       |       |       |       | 9/16/16       | -                                                            | M   | Moeri               | X   | X               | X                 | Healthy Release    | Healthy Release    |
| 23           |       |       |       |       |       |       | 9/19/16       | Cement water tank                                            | F   | Risule              | X   | X               | X                 | X                  | X                  |
| 24           |       |       |       |       |       |       | 9/19/16       | Cement water tank                                            | -   | Risule              | X   | X               | X                 | X                  | X                  |
| 25           |       |       |       |       |       |       | 9/19/16       | Cement water tank                                            | -   | Risule              | X   | X               | X                 | X                  | X                  |
| 26           |       |       |       |       |       |       | 9/19/16       | Cement water tank                                            | -   | Risule              | X   | X               | X                 | X                  | X                  |
| 27           |       |       |       |       |       |       | 9/17/16       | Metal drum, guarding nests                                   | M?  | Moka                | X   | X               | X                 | Skin Sample        | Skin Sample        |
| 28           |       |       |       |       |       |       | 9/17/16       | Metal drum, guarding nests                                   | M?  | Moka                | X   | X               | X                 | Skin Sample        | Skin Sample        |
| 29           |       |       |       |       |       |       | 9/19/16       | Cement water tank                                            | M   | Risule              | X   | X               | O                 | Healthy Release    | Healthy Release    |
| 30           |       |       |       |       |       |       | 9/19/16       | Non-dichromatic coloration; yellow ventral side              | F   | Risule              | X   | X               | X                 | Skin Sample        | Skin Sample        |
| 31           |       |       |       |       |       |       | 9/19/16       | Cement water tank                                            | M   | Risule              | X   | X               | O                 | Healthy Release    | Healthy Release    |
| 32           |       |       |       |       |       |       | 9/19/16       | Cement water tank                                            | M   | Risule              | X   | X               | O                 | Healthy Release    | Healthy Release    |
| 33           |       |       |       |       |       |       | 9/19/16       | Cement water tank                                            | M   | Risule              | X   | X               | O                 | Healthy Release    | Healthy Release    |
| 34           |       |       |       |       |       |       | 9/17/16       | Metal drum, guarding nests                                   | M?  | Moka                | X   | X               | X                 | Skin Sample        | Skin Sample        |
| 35           |       |       |       |       |       |       | 9/17/16       | Outside metal drum                                           | M?  | Moka                | X   | X               | X                 | Skin Sample        | Skin Sample        |
| 36           |       |       |       |       |       |       | 9/21/16       | <i>Di-chromatic coloration</i>                               | F   | Risule              | X   | X               | X                 | X                  | X                  |
| 37           |       |       |       |       |       |       | 9/21/16       | <i>In amplexus with Specimen 36</i>                          | M   | Risule              | X   | X               | X                 | X                  | X                  |
| 38           |       |       |       |       |       |       | 9/21/16       | <i>Di-chromatic coloration</i>                               | F   | <i>Arena Blanca</i> | X   | X               | X                 | <i>Skin Sample</i> | <i>Skin Sample</i> |
| 39           |       |       |       |       |       |       | 9/21/16       | <i>In amplexus with Specimen 38</i>                          | M   | <i>Arena Blanca</i> | X   | X               | X                 | <i>Skin Sample</i> | <i>Skin Sample</i> |
| 40           |       |       |       |       |       |       | 9/19/16       | Banana leaf above cement tank                                | -   | Risule              | X   | X               | X                 | X                  | X                  |
| 41           |       |       |       |       |       |       | 9/17/16       | Behind latrine at MWC                                        | -   | Moka                | X   | X               | O                 | Healthy Release    | Healthy Release    |
| 42           |       |       |       |       |       |       | 9/19/16       | Unknown species; orange and black mottling, black vocal sack | M   | Risule              | X   | X               | X                 | X                  | X                  |
| 43           |       |       |       |       |       |       | 9/21/16       | Fern on edge of trail                                        | F   | Risule              | X   | X               | O                 | Healthy Release    | Healthy Release    |
| 44           |       |       |       |       |       |       | 9/21/16       | Fern on edge of trail                                        | M   | Risule              | X   | X               | O                 | Healthy Release    | Healthy Release    |
| 45           |       |       |       |       |       |       | 9/19/16       | Mud puddle near cement water tank                            | -   | Risule              | X   | X               | X                 | X                  | X                  |
| 46           |       |       |       |       |       |       | 9/19/16       | Mud puddle near cement water tank                            | -   | Risule              | X   | X               | X                 | X                  | X                  |
| 47           |       |       |       |       |       |       | 9/19/16       | Mud puddle near cement water tank                            | -   | Risule              | X   | X               | X                 | X                  | X                  |
